# Supplementary material for: A human serum albumin-indocyanine green complex offers improved tumor identification in fluorescence-guided surgery
Source: PubMed Central journal article supplement — Transl Cancer Res. 2024 Jan 29;13(1):437–52. doi: 10.21037/tcr-23-2338 (PMC10894326; doi:10.21037/tcr-23-2338), 2024-01-29
Supplement: tcr-13-01-437-supplementary.pdf [file tcr-13-01-437-supplementary.pdf]

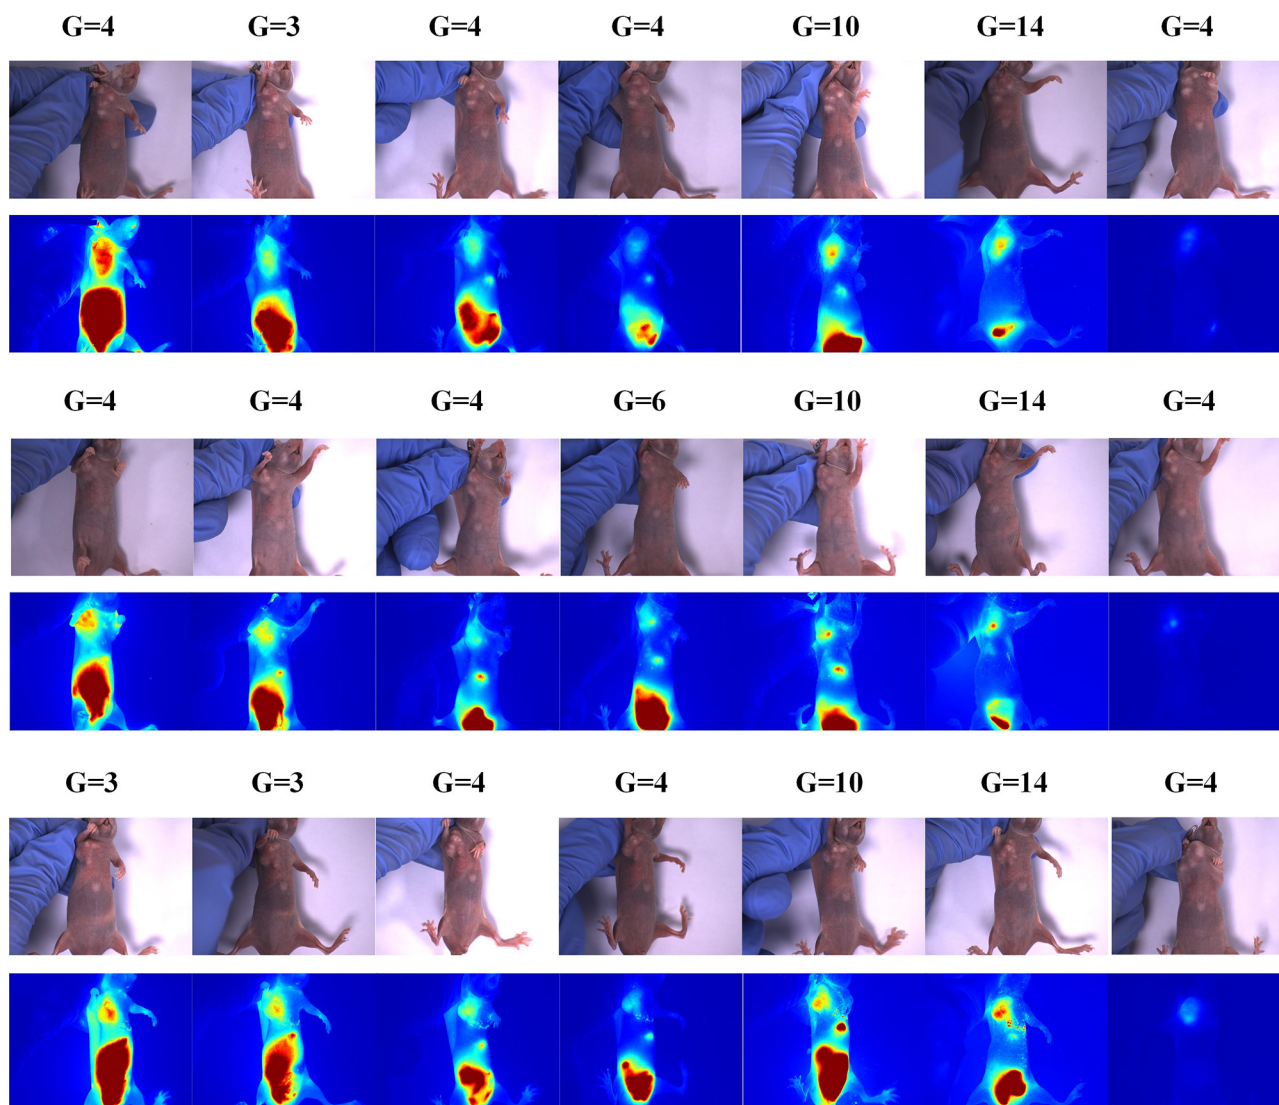

**Figure S1** 1:0 ICG-HSA injection group (n=3). The time points from left to right are 1, 2, 4, 8, 12, 24, 48 h. G represents the gain at that imaging time point. The camera height remains the same, H=40cm. ICG, Indocyanine green; HSA, human serum albumin.

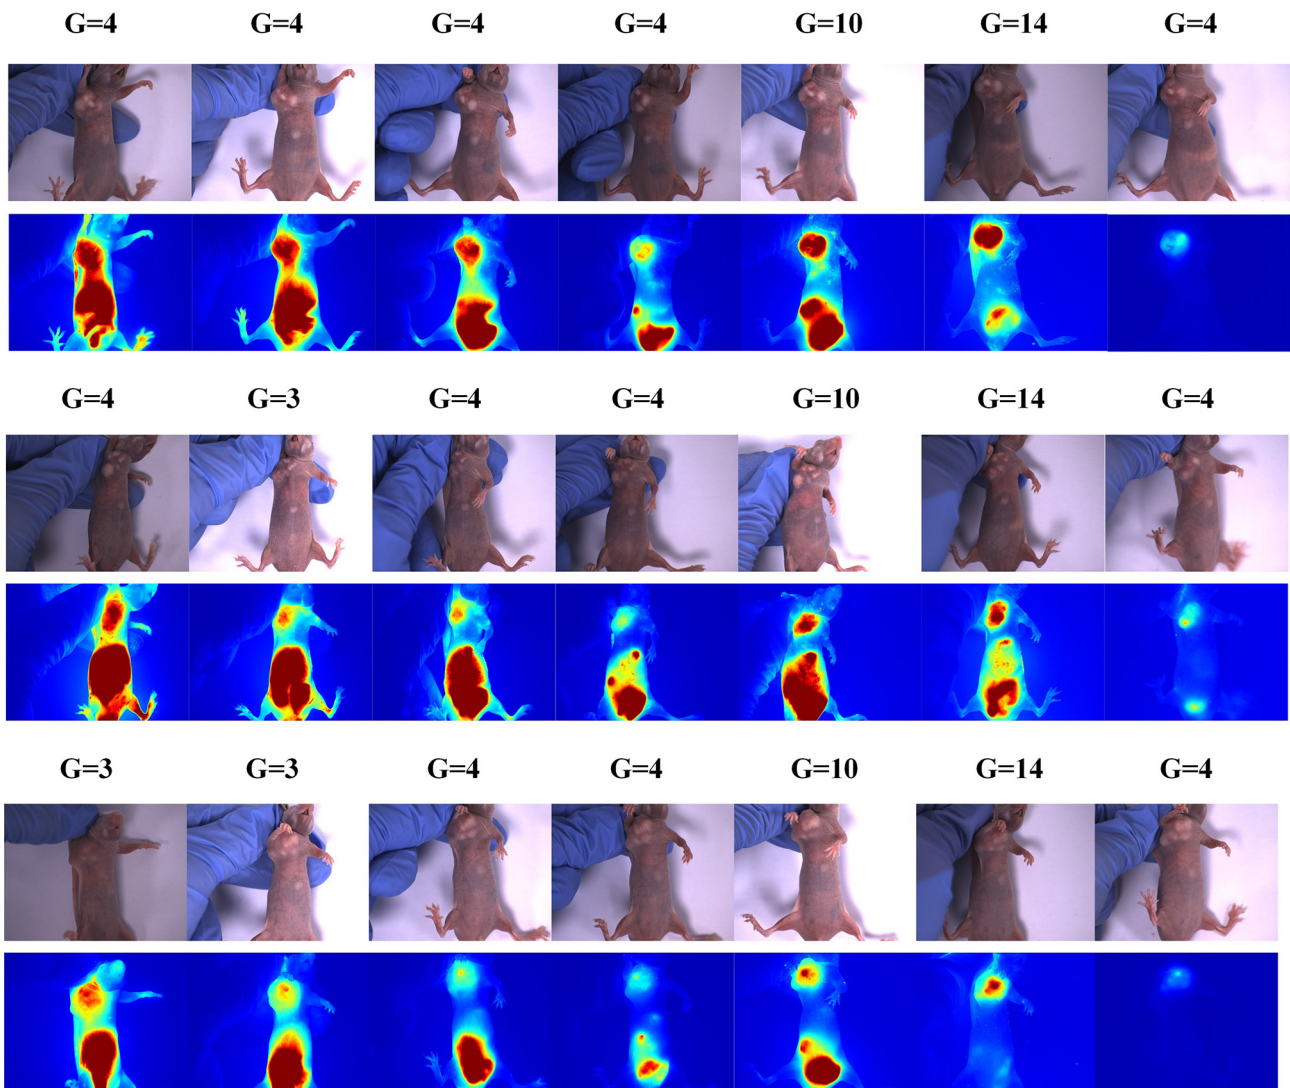

**Figure S2 4:5** ICG-HSA injection group (n=3). The time points from left to right are 1, 2, 4, 8, 12, 24, 48 h. G represents the gain at that imaging time point. The camera height remains the same, H=40 cm. ICG, Indocyanine green; HSA, human serum albumin.

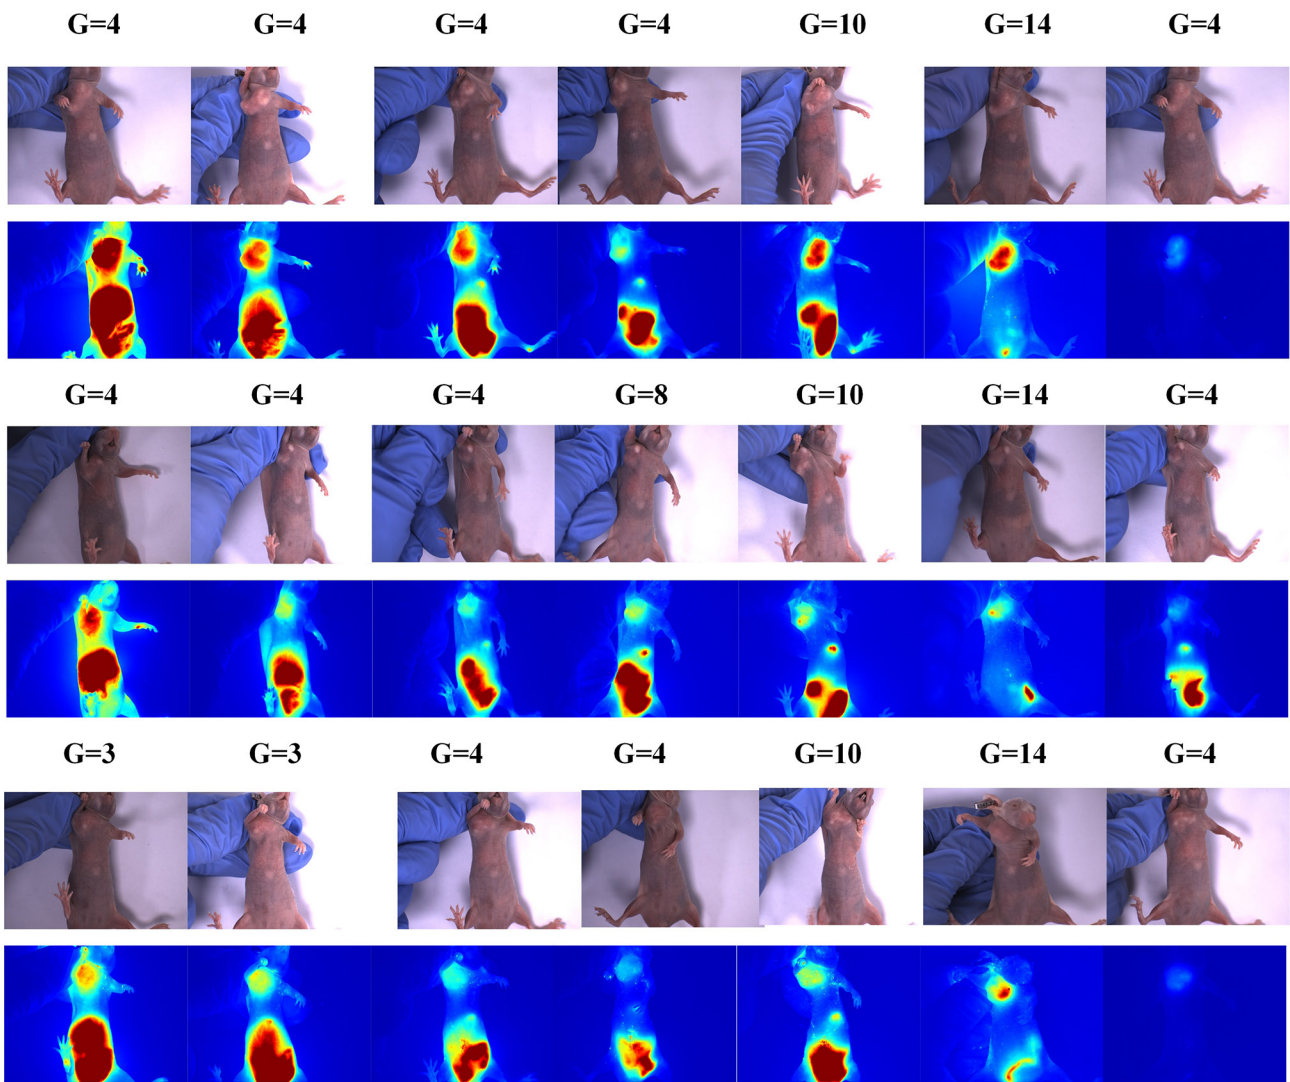

**Figure S3** 8:5 ICG-HSA injection group (n=3). The time points from left to right are 1, 2, 4, 8, 12, 24, 48 h. G represents the gain at that imaging time point. The camera height remains the same, H=40 cm. ICG, Indocyanine green; HSA, human serum albumin.

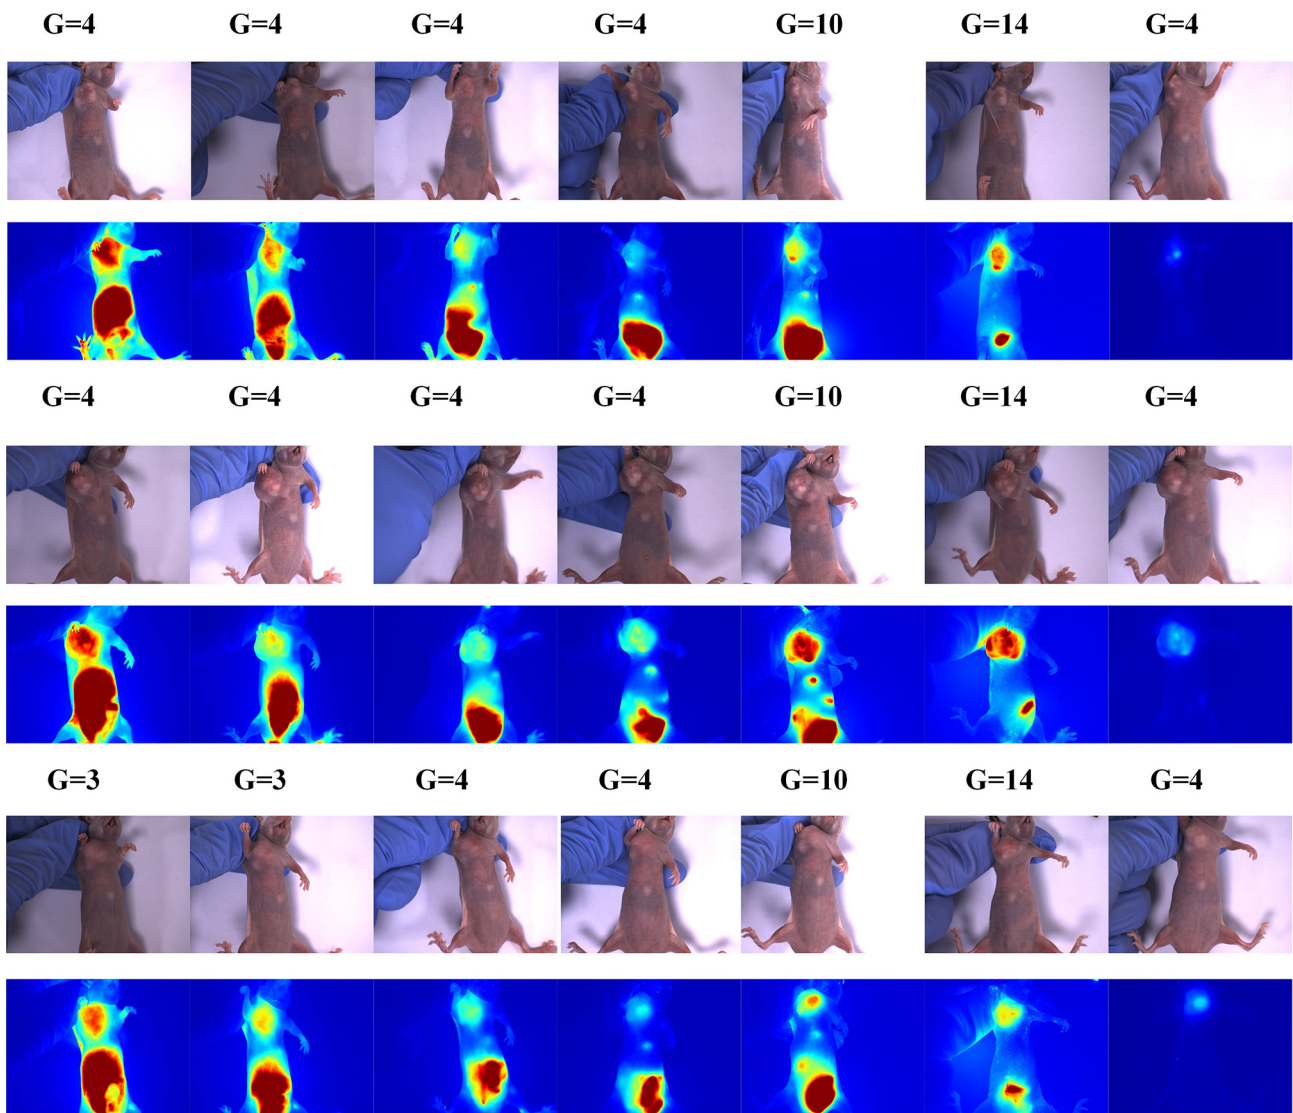

**Figure S4** 50:5 ICG-HSA injection group (n=3). The time points from left to right are 1, 2, 4, 8, 12, 24, 48 h. G represents the gain at that imaging time point. The camera height remains the same, H=40 cm. ICG, Indocyanine green; HSA, human serum albumin.
